# Supplementary material for: Highly selective conversion of CO2 to C2H6 on graphene modified chlorophyll Cu through multi-electron process for artificial photosynthesis
Source: Royal Society of Chemistry journal article supplement (doi:10.1039/c9nr07824j), 2019-01-01
Supplement: c9nr07824j1.pdf [file c9nr07824j1.pdf]

## Supporting Information

# Highly selective conversion of CO<sub>2</sub> to C<sub>2</sub>H<sub>6</sub> on graphene modified Chlorophyll Cu through multi-electron process artificial photosynthesis

Tongshun Wu<sup>\*a</sup>, Cheng Zhu<sup>b</sup>, Dongxue Han<sup>a,c</sup>, Zhenhui Kang<sup>\*b</sup>, and Li Niu<sup>a,c</sup>

<sup>a</sup> Centre for Advanced Analytical Science, c/o School of Chemistry and Chemical Engineering, Guangzhou University, Guangzhou 510006, P.R. China.

<sup>b</sup> Jiangsu Key Laboratory for Carbon-Based Functional Materials & Devices, Institute of Functional Nano & Soft Materials (FUNSOM), Soochow University, 199 Ren'ai Road, Suzhou, 215123, Jiangsu, PR China

<sup>c</sup> State Key Laboratory of Electroanalytical Chemistry, c/o Engineering Laboratory for Modern Analytical Techniques, Changchun Institute of Applied Chemistry, Chinese Academy of Sciences, Changchun 130022, Jilin, China

Corresponding author: tswu@gzhu.edu.cn; zhkang@suda.edu.cn

## **1. Preparation of photocatalyst**

**1.1 Preparation of previously exfoliated graphite (PEG)** In order to fully exfoliate graphite into graphene, a solid-exfoliation process was employed to prepare PEG. Natural flaked graphite was mixed and saturated with acids consisting of concentrated sulfuric acid and concentrated nitric acid in a volume ratio of 4:1. The reaction system was stirred with excess  $\text{FeCl}_3$  or  $\text{NH}_4\text{NO}_3$  ( $>0.25$  g/ml in the mixture) for 24 h to form the intercalated graphite compound. The concentration of nitric acid should be maintained at 10 mol/L (as higher concentrations will reduce the conductance of the resulting graphene). The mixture was then carefully vacuum filtered and washed with deionized water for 5 times until the pH of the solution was 6. After being dried at 60 °C in a vacuum oven for 2 h, the graphite was loaded in a ceramic vessel, placed in a microwave oven, and irradiated at 500 W for 90 s. Under microwave irradiation, the precursors expanded rapidly, accompanied by “lightening.”

**1.2 Preparation of graphene** In a typical synthesis of graphene, the PEG was dispersed in chlorosulfonic acid (CSA) and ultrasonicated for 10 min, forming a stable dispersion which attributed to the protonation of the graphitic material. The dispersion was allowed to settle for 2 h, allowing better intercalation of CSA. Then, hydrogen peroxide was slowly added into the dispersion to react with the intercalated CSA. The generated  $\text{O}_2$ ,  $\text{HCl}$ , and  $\text{SO}_3$  gases exfoliated the graphite to form graphene sheets (GS). Excess hydrogen peroxide is needed to ensure that CSA is quenched completely. After washing out the acid, the GS floated to the top of water and could be easily collected by filtration.

## Supplementary Figures

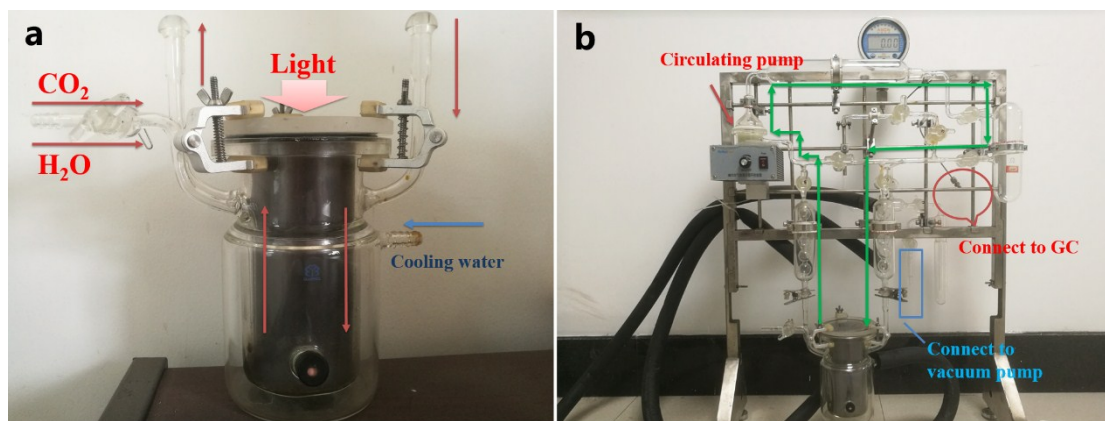

**Figure S1** (a) Photograph of reaction chamber, the red arrows stand for the direction of air flow; (b) Photograph of on-line vacuum system, the green arrows stand for the direction of air flow

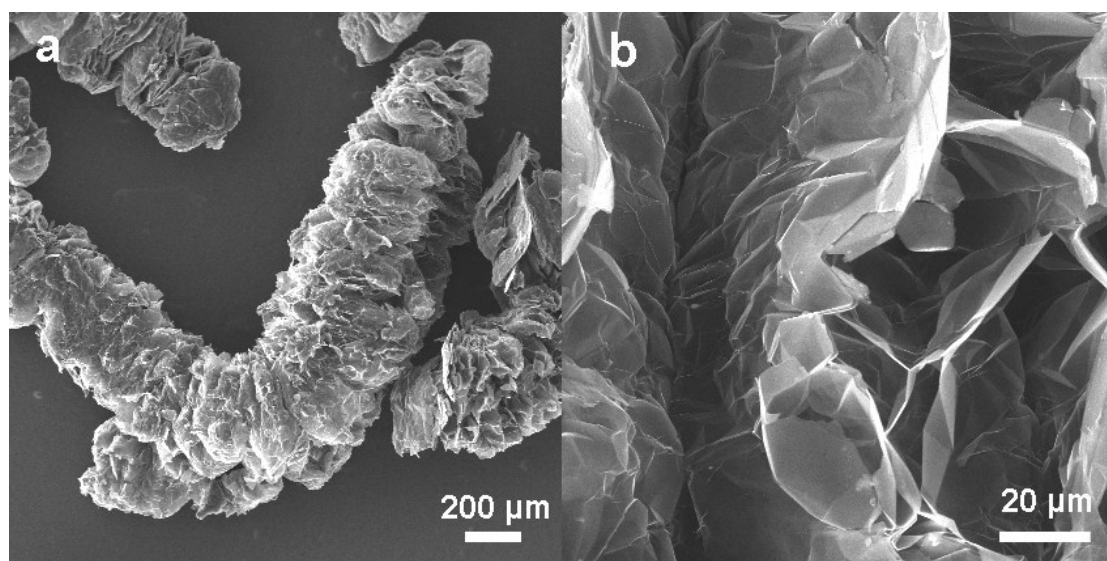

**Figure S2** The SEM images of previously exfoliated graphite in low (a) and high (b) magnification.

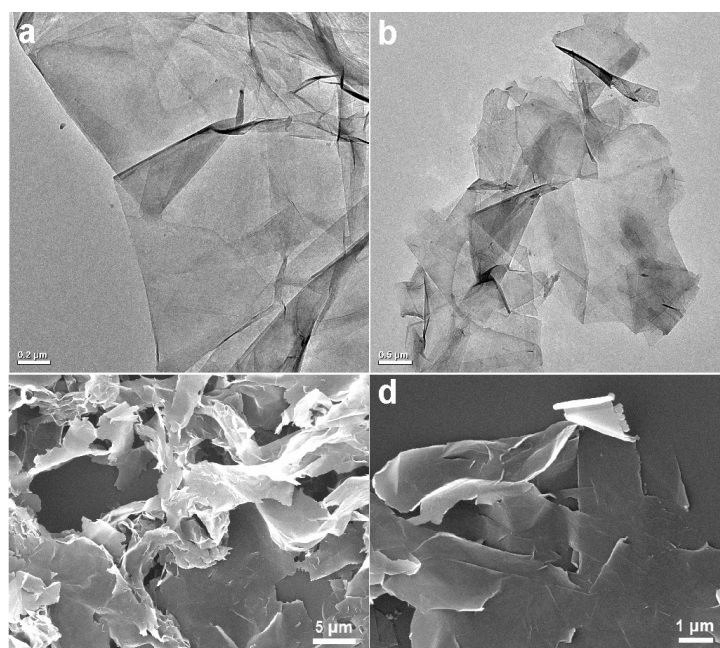

**Figure S3** The TEM image (a,b) and SEM (c,d) image of as-prepared graphene sheets.

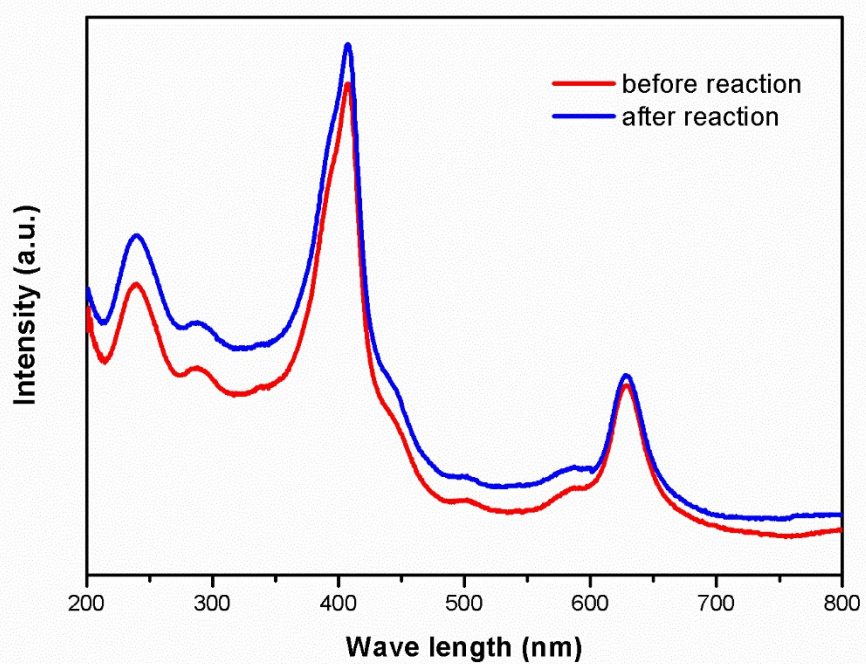

**Figure S4** The UV-vis measurement of g-Chl-Cu before and after photoreduction reaction.



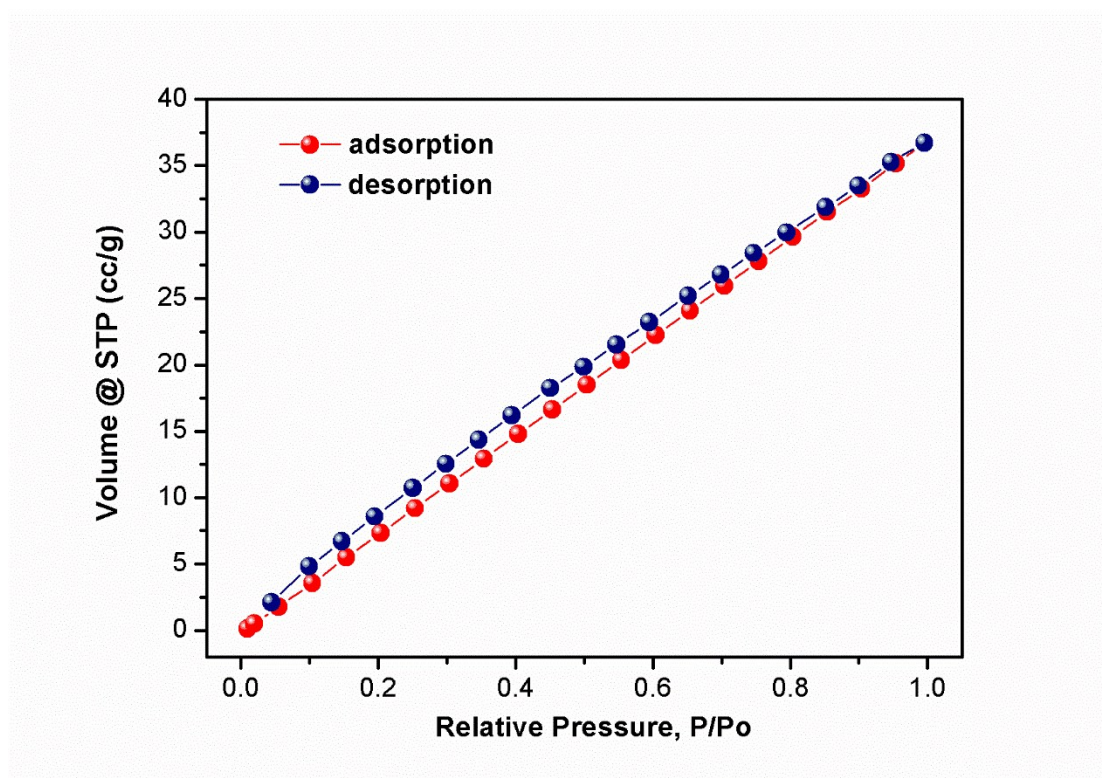

**Figure S5.** CO<sub>2</sub> sorption isotherms of g-Chl-Cu Photocatalyst powder at 25 °C.

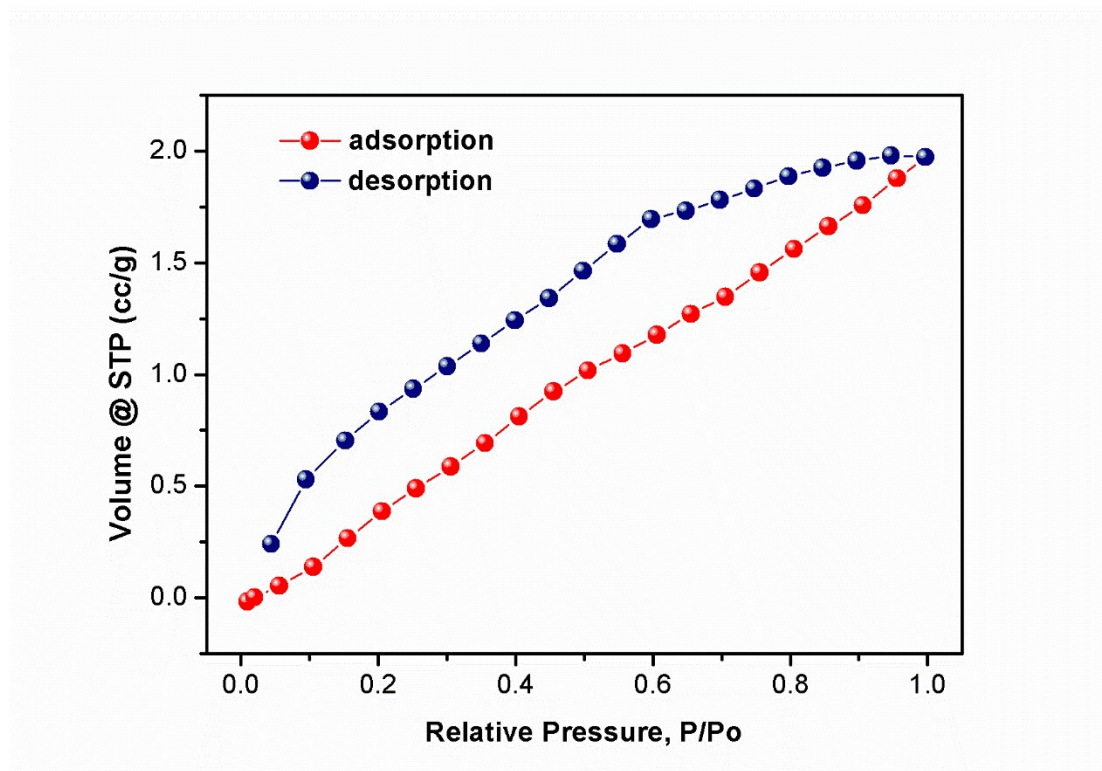

**Figure S6.** CO<sub>2</sub> sorption isotherms of Chl-Cu at 25 °C.

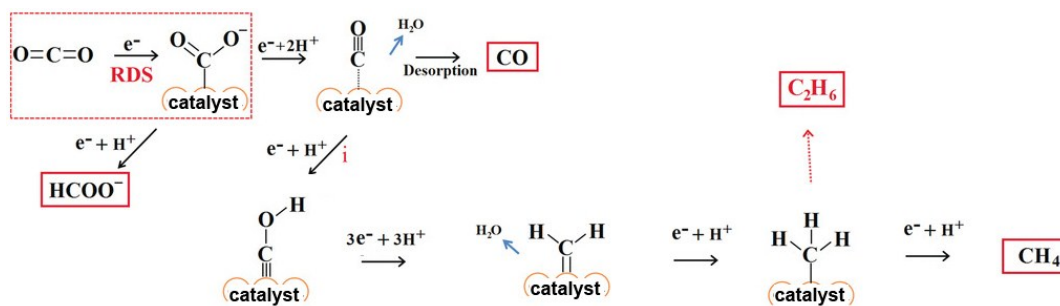

**Figure S7.** The first mechanism pathway of  $\text{CO}_2$  reduced to  $\text{C}_2\text{H}_6$  proposed by predecessors.
